# Supplementary material for: Proton-transfer rate constants for the determination of organic indoor air pollutants by online mass spectrometry
Source: Royal Society of Chemistry journal article supplement (doi:10.1039/d3ra01705b), 2023-01-01
Supplement: d3ra01705b1.pdf [file d3ra01705b1.pdf]

## SUPPORTING INFORMATION

### Proton-transfer rate constants for the determination of organic indoor air pollutants by online mass spectrometry

Tunga Salthammer<sup>1,\*</sup>, Uwe Hohm<sup>2</sup>, Marcel Stahn<sup>3</sup>, Stefan Grimme<sup>3</sup>

1) Department of Material Analysis and Indoor Chemistry, Fraunhofer WKI, 38108 Braunschweig, Germany

2) Institute of Physical and Theoretical Chemistry, University of Braunschweig – Institute of Technology, 38106 Braunschweig, Germany

3) Mulliken Center for Theoretical Chemistry, Institute for Physical and Theoretical Chemistry, University of Bonn, 53115 Bonn, Germany

\*) Corresponding author:

Prof. Dr. Tunga Salthammer

Email: [tunga.salthammer@wki.fraunhofer.de](mailto:tunga.salthammer@wki.fraunhofer.de)

**Appendix A: Calculation of the proton transfer reaction rate  $k_{ADO}$  from average dipole orientation (ADO) theory**

**Table S1.** Temperature dependence of  $C$  according to Su and Bowers (1975) and Su et al. (1978).

| 350 K (Su and Bowers, 1975) |       | 300 K (Su et al., 1978) |        |
|-----------------------------|-------|-------------------------|--------|
| $\mu_D/\alpha^{1/2}$        | $C$   | $\mu_D/\alpha^{1/2}$    | $C$    |
| 0.000                       | 0.000 | 0.0000                  | 0.0000 |
| 0.163                       | 0.039 | 0.1155                  | 0.0913 |
| 0.250                       | 0.076 | 0.2309                  | 0.1416 |
| 0.327                       | 0.106 | 0.3464                  | 0.1740 |
| 0.408                       | 0.130 | 0.4619                  | 0.1962 |
| 0.490                       | 0.149 | 0.5774                  | 0.2122 |
| 0.572                       | 0.164 | 0.6928                  | 0.2241 |
| 0.653                       | 0.178 | 0.8083                  | 0.2332 |
| 0.735                       | 0.189 | 0.9238                  | 0.2403 |
| 0.817                       | 0.198 | 1.1550                  | 0.2506 |
| 0.898                       | 0.206 | 1.2700                  | 0.2542 |
| 0.980                       | 0.213 | 1.3860                  | 0.2573 |
| 1.061                       | 0.220 | 1.5010                  | 0.2591 |
| 1.143                       | 0.225 | 1.6170                  | 0.2615 |
| 1.225                       | 0.230 | 1.7320                  | 0.2632 |
| 1.306                       | 0.234 | 1.8480                  | 0.2645 |
| 1.388                       | 0.238 | 1.9630                  | 0.2656 |
| 1.470                       | 0.242 |                         |        |
| 1.551                       | 0.245 |                         |        |
| 1.633                       | 0.248 |                         |        |
| 1.715                       | 0.251 |                         |        |
| 1.796                       | 0.253 |                         |        |
| 1.878                       | 0.255 |                         |        |
| 1.960                       | 0.257 |                         |        |
| 2.041                       | 0.259 |                         |        |

**Empirical equation (for best fit and interpolation purposes only):**

$$C = A_1 + \frac{-A_1}{1 + \left(\frac{\mu_D \cdot \alpha^{-1/2}}{A_2}\right)^p} \quad (\text{S1})$$

Non-linear regression analysis (Marquardt method), see Bevington and Robinson (2003), using ORIGIN 2021b (64-bit), see Table S2 for data.

**Table S2.** Best-fit parameters from equation (S1) for 300 K and 350 K.

| Temperature | $A_1$   | $A_2$   | $p$     |
|-------------|---------|---------|---------|
| 300 K       | 0.29366 | 0.24274 | 1.10725 |
| 350 K       | 0.28279 | 0.46805 | 1.56293 |

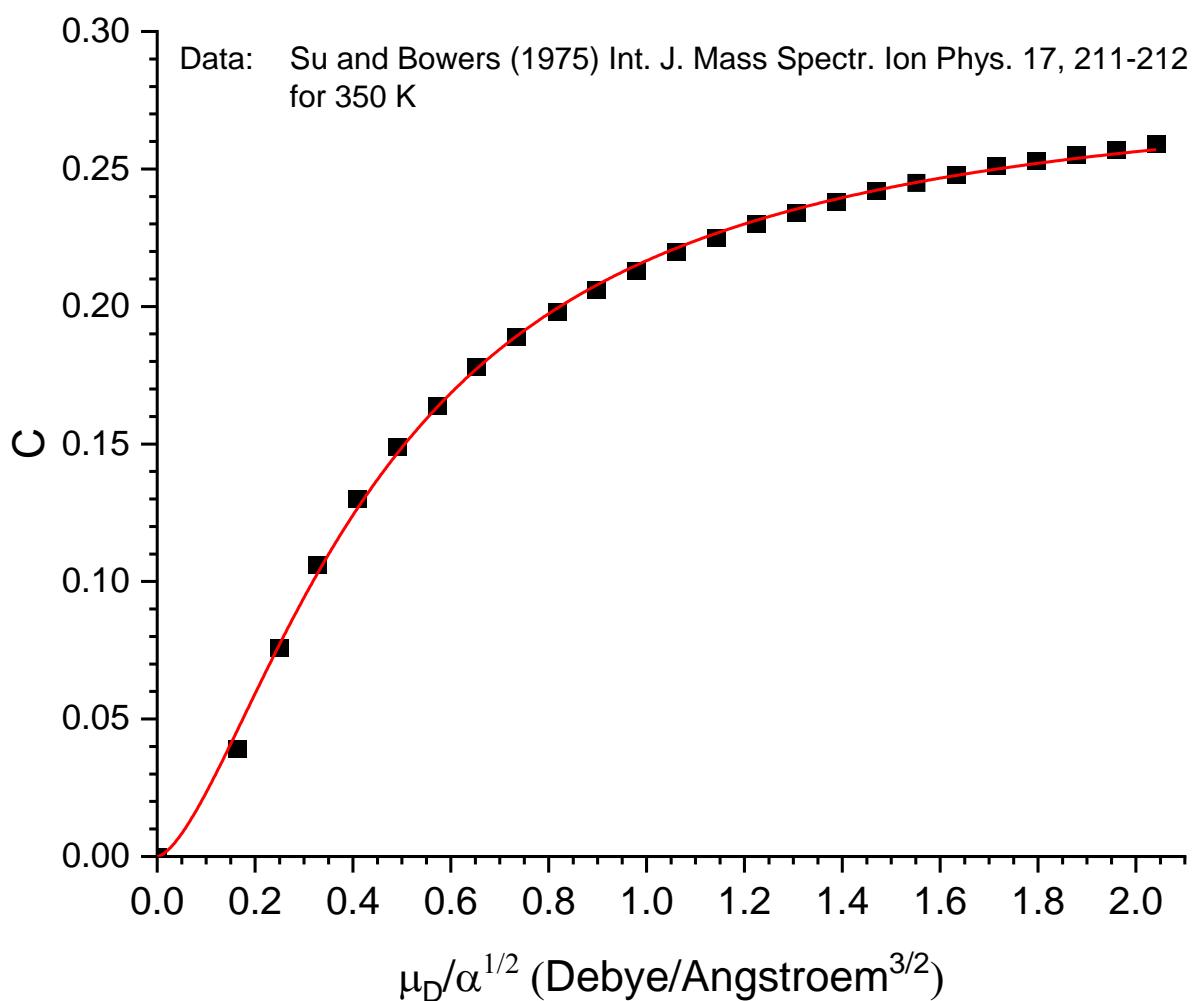

**Figure S1.** 350 K data from Table S1 and best-fit curve from equation S1. See Table S2 for fit parameters.

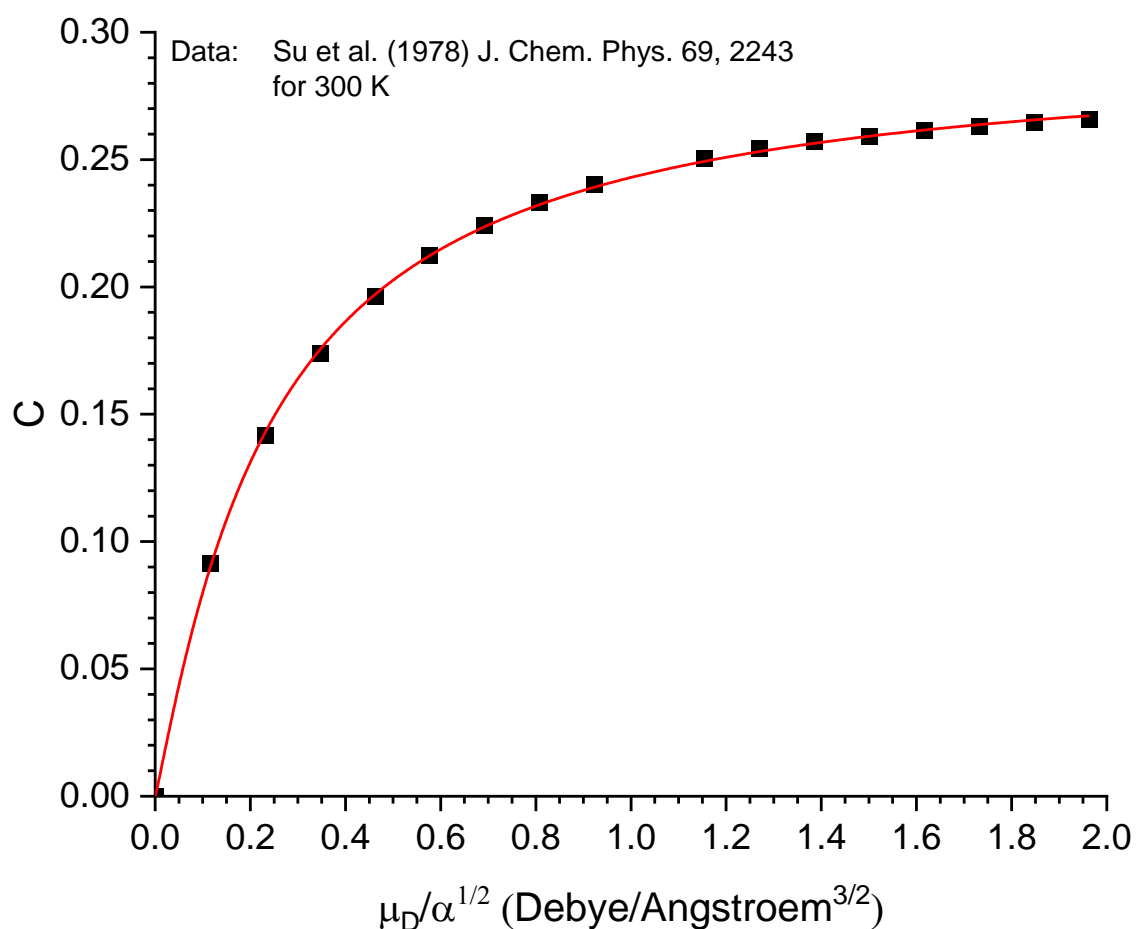

**Figure S2.** 300 K data from Table S1 and best-fit curve from equation S1. See Table S2 for fit parameters.

### Calculation of $k_{ADO}$ from ADO theory according to Su and Bowers (1973a, b)

Note: cgs units are used in the original work by Su and Bowers (1973a,b).

$$k_{ADO} = \frac{2 \cdot \pi \cdot q}{\sqrt{\mu_m}} \cdot \left[ \sqrt{\alpha} + C \cdot \mu_D \cdot \sqrt{\frac{2}{\pi \cdot k_B \cdot T}} \right] \quad (S2)$$

$$\frac{cm^3}{s} = \frac{\sqrt{\frac{g \cdot cm^3}{s}}}{\sqrt{g}} \left[ \sqrt{cm^3} + \frac{\sqrt{g \cdot cm^3}}{s} \cdot cm \cdot \sqrt{\frac{s^2 \cdot K}{cm^2 \cdot g \cdot K}} \right] \quad (\text{units for S2})$$

$$\mu_m = \frac{MW_1 \cdot MW_2}{MW_1 + MW_2} \cdot \frac{1}{N_A} \quad (\text{S3})$$

| Symbol    | Parameter                                                               | Unit                                                        |
|-----------|-------------------------------------------------------------------------|-------------------------------------------------------------|
| $k_{ADO}$ | Proton-transfer reaction constant                                       | $\text{cm}^3 \cdot \text{s}^{-1}$                           |
| $q$       | Elementary charge                                                       | $4.802675108022 \cdot 10^{-10}$ Franklin                    |
| $\mu_m$   | Reduced mass                                                            | g                                                           |
| $N_A$     | Avogadro Constant                                                       | $6.02214086 \cdot 10^{23} \text{ mol}^{-1}$                 |
| $\alpha$  | Polarizability                                                          | $10^{-24} \cdot \text{cm}^3$                                |
| $C$       | compensates for the effectiveness of the charge "locking in" the dipole |                                                             |
| $\mu_D$   | Dipole moment                                                           | Franklin·cm                                                 |
| $k_B$     | Boltzmann Constant                                                      | $1.38064852 \cdot 10^{-16} \text{ erg} \cdot \text{K}^{-1}$ |
| $T$       | Temperature                                                             | Kelvin                                                      |

1 Franklin (Fr) =  $3.335641 \cdot 10^{-10}$  Coulomb (C)

$1.602 \cdot 10^{-19} \text{ C} = 4.8026751080227 \cdot 10^{-10}$  Franklin

$$1 \text{ Fr} = 1 \frac{\sqrt{g \cdot \text{cm}^3}}{\text{s}}$$

1 Debye =  $1 \cdot 10^{-18}$  Fr·cm

$1.380649 \cdot 10^{-23} \text{ J} \cdot \text{K}^{-1} (\text{m}^2 \cdot \text{kg} \cdot \text{s}^{-2} \cdot \text{K}^{-1}) = 1.380649 \cdot 10^{-16} \text{ erg} \cdot \text{K}^{-1}$

$$1 \text{ erg} = 1 \frac{\text{cm}^2 \cdot \text{g}}{\text{s}^2}$$

In SI units, equation (S2) reads as follows:

$$k_{ADO} = \sqrt{\frac{\pi \cdot \alpha \cdot q^2}{\epsilon_0 \cdot \mu_m}} + \frac{C \cdot \mu_D \cdot q}{\epsilon_0} \cdot \sqrt{\frac{1}{2 \cdot \pi \cdot \mu_m \cdot k_B \cdot T}} \quad (\text{S2a})$$

Note that according to equation (2a)  $k_{ADO}$  is obtained in the unit  $\text{m}^3/\text{s}$  (for SI units of the parameters and constants see Appendix B).

$1 \text{ cm}^3/\text{s} = 10^{-6} \text{ m}^3/\text{s}$

**Appendix B: Calculation of the proton transfer reaction rate  $k_{cap}$  from ion-polar molecule collision trajectory analysis according to Su and Chesnavich (1982).**

$$k_L = \sqrt{\frac{\pi \cdot \alpha \cdot q^2}{\mu_m \cdot \epsilon_0}} \quad (S4)$$

$$k_{cap} = k_L \cdot K_{cap}(T_R) \quad (S5)$$

$$T_R = 4 \cdot \pi \cdot \epsilon_0 \cdot \frac{2 \cdot \alpha \cdot k_B \cdot T}{\mu_D^2} \quad (S6)$$

$$x = \sqrt{\frac{1}{T_R}} \quad (S7)$$

|                |                                 |                 |
|----------------|---------------------------------|-----------------|
| $K_{cap}(T_R)$ | $0.9754 + (x + 0.509)^2/10.526$ | $x \leq 2$      |
|                | $0.4767 \cdot x + 0.6200$       | $2 < x \leq 3$  |
|                | $0.5781 \cdot x + 0.3165$       | $3 < x \leq 35$ |

$K_{cap}$  is insensitive to the moment of inertia  $I$  when equation (S8) is met (Su and Chesnavich, 1982).

$$I^* = \frac{\mu_D \cdot I}{\alpha \cdot q \cdot \mu_m} < \frac{0.7 + x^2}{2 + 0.6 \cdot x} \quad (S8)$$

| Symbol       | Parameter                         | Unit                                                    |
|--------------|-----------------------------------|---------------------------------------------------------|
| $k_{cap}$    | Proton-transfer reaction constant | $m^3 \cdot s^{-1}$                                      |
| $q$          | Elementary charge                 | $1.602 \cdot 10^{-19} \text{ C}$                        |
| $\epsilon_0$ | Vacuum permittivity               | $8.854 \cdot 10^{-12} \text{ F} \cdot \text{m}^{-1}$    |
| $\mu_m$      | Reduced mass                      | kg                                                      |
| $N_A$        | Avogadro Constant                 | $6.02214086 \cdot 10^{23} \text{ mol}^{-1}$             |
| $\alpha$     | Polarizability                    | $m^3$                                                   |
| $\mu_D$      | Dipole moment                     | C·m                                                     |
| $k_B$        | Boltzmann Constant                | $1.380649 \cdot 10^{-23} \text{ J} \cdot \text{K}^{-1}$ |
| $T$          | Temperature                       | Kelvin                                                  |

**Appendix C: Calculation of the proton transfer reaction rate  $k_{cap}^*$  from advanced ion-polar molecule collision trajectory analysis according to Su (1994).**

$$k_{cap}^* = k_L \cdot K_C(\tau, \varepsilon) \quad (S9)$$

$$\tau = \frac{\mu_D}{\sqrt{\alpha \cdot T}} \quad (S10)$$

$$\varepsilon = \frac{\mu_D}{\sqrt{\alpha \cdot KE_{CM}}} \quad (S11)$$

$$K_C(\tau, \varepsilon) = 1 + C_1 \cdot \tau^{0.4} \cdot \varepsilon^2 \cdot S + C_2 \cdot (1 - S) \cdot \sin[C_3 \cdot \{C_4 + \ln(\tau)\}] \cdot \tau^{0.6} \cdot (\varepsilon - 0.5)^{1/2} \quad (S12)$$

$$C_1 = 0.727143$$

$$C_2 = 3.71823$$

$$C_3 = 0.586920$$

$$C_4 = 4.97894$$

|   |                                      |                        |
|---|--------------------------------------|------------------------|
| S | $\exp[-2 \cdot (\varepsilon - 1.5)]$ | $\varepsilon > 1.5$    |
|   | 1                                    | $\varepsilon \leq 1.5$ |

| Symbol      | Parameter                         | Unit                                                                                            |
|-------------|-----------------------------------|-------------------------------------------------------------------------------------------------|
| $k_L$       | Langevin constant (see eq. S4)    | $\text{cm}^3 \cdot \text{s}^{-1}$<br>(convert from $\text{m} \cdot \text{s}^{-1}$ if necessary) |
| $k_{cap}^*$ | Proton-transfer reaction constant | $\text{cm}^3 \cdot \text{s}^{-1}$                                                               |
| $\alpha$    | Polarizability                    | $\text{\AA}^3$ ( $10^{-24} \text{ cm}^3$ )                                                      |
| $\mu_D$     | Dipole moment                     | Debye                                                                                           |
| $T$         | Temperature                       | Kelvin                                                                                          |
| $KE_{cm}$   | Center of mass kinetic energy     | eV                                                                                              |

$$KE_{ion} = \frac{3}{2} \cdot k_B \cdot T + \frac{1}{2} \cdot m_{ion} \cdot v_d^2 + \frac{1}{2} \cdot m_{air} \cdot v_d^2 \quad (S13)$$

$$KE_{CM} = \frac{m_m}{m_m + m_{ion}} \left( KE_{ion} - \frac{3}{2} \cdot k_B \cdot T \right) + \frac{3}{2} \cdot k_B \cdot T \quad (S14)$$

| Symbol     | Parameter                                                                                      | Unit                                                    |
|------------|------------------------------------------------------------------------------------------------|---------------------------------------------------------|
| $m_{ion}$  | mass of the respective ion<br>( $H_3O^+$ or $H_3O^+ \cdot n(H_2O)$ )                           | kg                                                      |
| $m_{air}$  | mass of the buffer gas<br>( $MW_{air} \text{ (dry)} = 28.96 \text{ g} \cdot \text{mol}^{-1}$ ) | kg                                                      |
| $m_m$      | mass of the molecule                                                                           | kg                                                      |
| $v_d$      | Ion velocity in the drift tube                                                                 | $\text{m} \cdot \text{s}^{-1}$                          |
| $k_B$      | Boltzmann constant                                                                             | $1.380649 \cdot 10^{-23} \text{ J} \cdot \text{K}^{-1}$ |
| $T$        | absolute temperature                                                                           | Kelvin                                                  |
| $KE_{ion}$ | Total mean ion kinetic energy                                                                  | J                                                       |
| $KE_{CM}$  | Center of mass kinetic energy                                                                  | J                                                       |

Note:  $KE_{ion}$  and  $KE_{CM}$  are obtained in Joule.  $KE_{CM}$  must be converted to eV before used in equation (S11).

$$1 \text{ eV} = 1.602 \cdot 10^{-19} \text{ J}$$



## Appendix D: Compounds and parameters

**Table S3.** Monoisotopic molecular masses (MW) and calculated rate constants  $k_{\text{cap}}$  and  $k_{\text{ADO}}$ .

| Compound                                 | CAS       | MW <sup>1)</sup><br>(g/mol) | $k_{\text{cap}}$<br>( $10^{-9}$ cm <sup>3</sup> /s) | $k_{\text{ADO}}$<br>( $10^{-9}$ cm <sup>3</sup> /s) |
|------------------------------------------|-----------|-----------------------------|-----------------------------------------------------|-----------------------------------------------------|
| <b>Aliphatic and cyclic hydrocarbons</b> |           |                             |                                                     |                                                     |
| n-Hexane                                 | 110-54-3  | 86.11                       | 2.00                                                | 1.99                                                |
| n-Heptane                                | 142-82-5  | 100.13                      | 2.13                                                | 2.12                                                |
| n-Octane                                 | 111-65-9  | 114.14                      | 2.25                                                | 2.24                                                |
| n-Nonane                                 | 111-84-2  | 128.16                      | 2.36                                                | 2.35                                                |
| n-Decane                                 | 124-18-5  | 142.17                      | 2.47                                                | 2.46                                                |
| Cyclohexane                              | 110-82-7  | 84.09                       | 1.91                                                | 1.91                                                |
| Methylcyclohexane                        | 108-87-2  | 98.11                       | 2.07                                                | 2.05                                                |
| 4-Vinyl cyclohexene (4-VCH)              | 100-40-3  | 108.09                      | 2.23                                                | 2.18                                                |
| <b>Aromatic hydrocarbons</b>             |           |                             |                                                     |                                                     |
| Benzene                                  | 71-43-2   | 78.05                       | 1.90                                                | 1.90                                                |
| Toluene                                  | 108-88-3  | 92.06                       | 2.14                                                | 2.07                                                |
| Ethylbenzene                             | 100-41-4  | 106.08                      | 2.27                                                | 2.19                                                |
| o-Xylene                                 | 95-47-6   | 106.08                      | 2.36                                                | 2.24                                                |
| m-Xylene                                 | 108-38-3  | 106.08                      | 2.27                                                | 2.20                                                |
| p-Xylene                                 | 106-42-3  | 106.08                      | 2.18                                                | 2.18                                                |
| 1,2,3-Trimethylbenzene                   | 526-73-8  | 120.09                      | 2.50                                                | 2.37                                                |
| 1,2,4-Trimethylbenzene                   | 95-63-6   | 120.09                      | 2.39                                                | 2.32                                                |
| 1,3,5-Trimethylbenzene                   | 108-67-8  | 120.09                      | 2.31                                                | 2.31                                                |
| Isopropylbenzene                         | 98-82-8   | 120.09                      | 2.37                                                | 2.30                                                |
| Styrene                                  | 100-42-5  | 104.06                      | 2.25                                                | 2.22                                                |
| Chlorobenzene                            | 108-90-7  | 112.01                      | 2.93                                                | 2.64                                                |
| 1,2-Dichlorobenzene                      | 95-50-1   | 145.97                      | 3.65                                                | 3.17                                                |
| 1,4-Dichlorobenzene                      | 106-46-7  | 145.97                      | 2.18                                                | 2.18                                                |
| 4-Phenyl cyclohexene (4-PCH)             | 4994-16-5 | 158.11                      | 2.60                                                | 2.55                                                |
| <b>Polycyclic aromatic hydrocarbons</b>  |           |                             |                                                     |                                                     |
| Naphthalene                              | 91-20-3   | 128.06                      | 2.40                                                | 2.40                                                |
| 1-Methylnaphthalene                      | 90-12-0   | 142.08                      | 2.59                                                | 2.52                                                |
| 1-Chloronaphthalene                      | 90-13-1   | 162.02                      | 3.22                                                | 2.97                                                |
| Anthracene                               | 120-12-7  | 178.08                      | 2.89                                                | 2.89                                                |

|                        |            |        |      |      |
|------------------------|------------|--------|------|------|
| Phenanthrene           | 85-01-8    | 178.08 | 2.82 | 2.82 |
| <b>Terpenoids</b>      |            |        |      |      |
| Isoprene               | 78-79-5    | 68.06  | 1.97 | 1.92 |
| $\alpha$ -Pinene       | 80-56-8    | 136.13 | 2.37 | 2.33 |
| $\beta$ -Pinene        | 127-91-3   | 136.13 | 2.54 | 2.42 |
| 3-Carene               | 13466-78-9 | 136.13 | 2.38 | 2.35 |
| d-Limonene             | 5989-27-5  | 136.13 | 2.54 | 2.44 |
| $\alpha$ -Phellandrene | 4221-98-1  | 136.13 | 2.44 | 2.40 |
| Myrcene                | 123-35-3   | 136.13 | 2.58 | 2.50 |
| $\beta$ -Caryophyllene | 87-44-5    | 204.19 | 2.93 | 2.83 |
| Terpinolene            | 586-62-9   | 136.13 | 2.47 | 2.42 |
| Linalool               | 78-70-6    | 154.14 | 3.14 | 2.90 |
| $\alpha$ -Terpineol    | 98-55-5    | 154.14 | 2.99 | 2.77 |
| <b>Alcohols</b>        |            |        |      |      |
| Methanol               | 67-56-1    | 32.03  | 2.51 | 2.09 |
| Ethanol                | 64-17-5    | 46.04  | 2.56 | 2.20 |
| 1-Propanol             | 71-23-8    | 60.06  | 2.56 | 2.25 |
| 2-Propanol             | 67-63-0    | 60.06  | 2.58 | 2.26 |
| 1-Butanol              | 71-36-3    | 74.07  | 2.63 | 2.35 |
| 2-Butanol              | 75-65-0    | 74.07  | 2.64 | 2.35 |
| 2-Methyl-1-propanol    | 78-83-1    | 74.07  | 2.57 | 2.31 |
| 1-Pentanol             | 71-41-0    | 88.09  | 2.68 | 2.43 |
| 1-Hexanol              | 111-27-3   | 102.10 | 2.78 | 2.53 |
| 1-Heptanol             | 111-70-6   | 116.12 | 2.87 | 2.62 |
| 2-Ethyl-1-hexanol      | 104-76-7   | 130.14 | 2.91 | 2.68 |
| Benzyl alcohol         | 100-51-6   | 108.06 | 2.78 | 2.55 |
| <b>Aldehydes</b>       |            |        |      |      |
| Acetaldehyde           | 75-07-0    | 44.03  | 3.93 | 3.00 |
| Propanal               | 123-38-6   | 58.04  | 3.75 | 2.99 |
| Butanal                | 123-72-8   | 72.06  | 3.70 | 3.04 |
| 2-Methylpropanal       | 78-84-2    | 72.06  | 3.79 | 3.09 |
| Pentanal               | 110-62-3   | 86.07  | 3.73 | 3.13 |
| Hexanal                | 66-25-1    | 100.09 | 3.76 | 3.19 |
| Heptanal               | 111-71-7   | 114.10 | 3.84 | 3.29 |
| Octanal                | 124-13-0   | 128.12 | 3.89 | 3.36 |
| Nonanal                | 124-19-6   | 142.13 | 3.94 | 3.43 |

|                                  |            |        |      |      |
|----------------------------------|------------|--------|------|------|
| Decanal                          | 112-31-2   | 156.15 | 4.00 | 3.51 |
| Acrolein (trans)                 | 107-02-8   | 56.03  | 4.44 | 3.41 |
| Acrolein (cis)                   | 107-02-8   | 56.03  | 3.72 | 2.97 |
| trans-2-Butenal                  | 123-73-9   | 70.04  | 5.26 | 3.98 |
| trans-2-Hexenal                  | 6728-26-3  | 98.07  | 5.39 | 4.20 |
| Furfural (trans)                 | 98-01-1    | 96.02  | 4.50 | 3.59 |
| Furfural (cis)                   | 98-01-1    | 96.02  | 5.27 | 4.04 |
| Glyoxal (cis)                    | 107-22-2   | 58.01  | 4.64 | 3.40 |
| Benzaldehyde                     | 100-52-7   | 106.04 | 4.35 | 3.61 |
| <b>Ketones</b>                   |            |        |      |      |
| Acetone                          | 67-64-1    | 58.04  | 4.05 | 3.16 |
| 2-Butanone (MEK)                 | 78-93-3    | 72.06  | 3.85 | 3.13 |
| 4-Methyl-2-pentanone (MIBK)      | 108-10-1   | 100.09 | 3.79 | 3.21 |
| Cyclohexanone                    | 108-94-1   | 98.07  | 4.35 | 3.53 |
| 6-Methyl-5-heptene-2-one (6-MHO) | 110-93-0   | 126.10 | 3.92 | 3.38 |
| 4-Oxopentanal (4-OPA)            | 626-96-0   | 100.05 | 3.78 | 3.16 |
| Geranylacetone                   | 3796-70-1  | 194.17 | 4.10 | 3.67 |
| 3-Octanone                       | 106-68-3   | 128.12 | 3.76 | 3.27 |
| <b>Esters</b>                    |            |        |      |      |
| Methyl acetate                   | 79-20-9    | 74.04  | 2.70 | 2.34 |
| Ethyl acetate                    | 141-78-6   | 88.05  | 2.91 | 2.54 |
| n-Butyl acetate                  | 123-86-4   | 116.08 | 3.07 | 2.74 |
| 2-Ethylhexyl acetate             | 103-09-3   | 172.15 | 3.22 | 2.96 |
| Dimethyl phthalate               | 131-11-3   | 194.06 | 4.06 | 3.55 |
| Diethylphthalate                 | 84-66-2    | 222.09 | 3.90 | 3.52 |
| Dimethyl succinate               | 106-65-0   | 146.06 | 2.53 | 2.35 |
| Dimethyl adipate                 | 627-93-0   | 174.09 | 2.74 | 2.55 |
| Dimethyl sebacate                | 106-79-6   | 230.15 | 3.23 | 3.02 |
| <b>Glycols</b>                   |            |        |      |      |
| 2-Ethoxyethanol                  | 110-80-5   | 90.07  | 3.32 | 2.83 |
| 1-Methoxy-2-propanol             | 107-98-2   | 90.07  | 3.21 | 2.76 |
| 1,2-Propanediol                  | 57-55-6    | 76.05  | 3.15 | 2.66 |
| 2-Butoxyethanol                  | 111-76-2   | 118.10 | 3.42 | 2.98 |
| 2-Butoxyethoxyethanol            | 54446-78-5 | 162.13 | 3.88 | 3.39 |
| Phenoxyethanol                   | 122-99-6   | 138.07 | 2.94 | 2.70 |
| 2-Butoxyethyl acetate            | 112-07-2   | 160.11 | 3.01 | 2.77 |

| <b>Acids</b>          |           |        |      |      |
|-----------------------|-----------|--------|------|------|
| Formic acid           | 64-18-6   | 46.01  | 2.24 | 1.90 |
| Acetic acid           | 64-19-7   | 60.02  | 2.55 | 2.18 |
| Propionic acid        | 79-09-4   | 74.04  | 2.52 | 2.21 |
| Hexanoic acid         | 142-62-1  | 116.08 | 2.74 | 2.50 |
| Isobutyric acid       | 79-31-2   | 88.05  | 2.64 | 2.35 |
| <b>Phenones</b>       |           |        |      |      |
| Acetophenone          | 98-86-2   | 120.06 | 4.14 | 3.51 |
| Benzophenone          | 119-61-9  | 182.07 | 4.34 | 3.81 |
| Darocur 1173          | 7473-98-5 | 164.08 | 4.88 | 4.10 |
| Irgacure 184          | 947-19-3  | 204.12 | 4.60 | 3.99 |
| <b>Siloxanes</b>      |           |        |      |      |
| D4                    | 556-67-2  | 296.08 | 3.08 | 2.98 |
| D5                    | 541-02-6  | 370.09 | 3.48 | 3.33 |
| D6                    | 540-97-6  | 444.11 | 3.73 | 3.60 |
| <b>Other</b>          |           |        |      |      |
| Acetonitrile          | 75-05-8   | 41.03  | 5.31 | 3.80 |
| Ethylamine            | 75-04-7   | 45.06  | 2.28 | 2.03 |
| Diethylamine          | 109-89-7  | 73.09  | 2.20 | 2.05 |
| Triethylamine         | 121-44-8  | 101.12 | 2.27 | 2.16 |
| Dimethyl sulfide      | 75-18-3   | 62.02  | 2.60 | 2.30 |
| 1,3-Benzothiazol      | 95-16-9   | 135.01 | 2.73 | 2.54 |
| N-Methyl-2-pyrrolidon | 872-50-4  | 99.07  | 5.07 | 3.93 |
| 2-Butanonoxim         | 96-29-7   | 87.07  | 2.22 | 2.07 |
| Phenol                | 108-95-2  | 94.04  | 2.47 | 2.28 |

1) calculated for the most abundant isotopes

## References

Bevington, P.R., Robinson, D.K., 2003. Data reduction and error analysis for the physical sciences. McGraw Hill, New York.

Su, T., 1994. Parametrization of kinetic energy dependences of ion–polar molecule collision rate constants by trajectory calculations. *Journal of Chemical Physics* 100, 4703-4703.

Su, T., Bowers, M.T., 1973a. Theory of ion-polar molecule collisions. Comparison with experimental charge transfer reactions of rare gas ions to geometric isomers of difluorobenzene and dichloroethylene. *Journal of Chemical Physics* 58, 3027-3037.

Su, T., Bowers, M.T., 1973b. Ion-polar molecule collisions: the effect of ion size on ion-polar molecule rate constants; the parameterization of the average-dipole-orientation theory. *International Journal of Mass Spectrometry and Ion Physics* 12, 347-356.

Su, T., Bowers, M.T., 1975. Parameterization of the average dipole orientation theory: temperature dependence. *International Journal of Mass Spectrometry and Ion Physics* 17, 211-212.

Su, T., Chesnavich, W.J., 1982. Parametrization of the ion–polar molecule collision rate constant by trajectory calculations. *Journal of Chemical Physics* 76, 5183-5185.

Su, T., Su, E.C.F., Bowers, M.T., 1978. Ion–polar molecule collisions. Conservation of angular momentum in the average dipole orientation theory. The AADO theory. *Journal of Chemical Physics* 69, 2243-2250.
